# Supplementary material for: Host transcriptional profiling identifies B cell associated genes to be upregulated in individuals with asymptomatic COVID-19 and latent tuberculosis
Source: Research Square preprint supplement (doi:10.21203/rs.3.rs-8500902/v1), 2026-01-12
Supplement: Supplementary file 1 [file 6b01deeeb1c6c3124d68b5cb.docx]

**Supplementary Table 4. Adaptive and innate immune response genes differentially regulated between LTBI-COVID and COVID group participants**

| **Category** | **Gene** | **Effect** | **log2 fold change** | **P value** | **Function** |
| --- | --- | --- | --- | --- | --- |
| T cell | TRGC1 | Up | 3.04 | 0.0396 | Involved in T cell receptor signalling pathway; adaptive immune response; and gamma-delta T cell activation. |
| T cell | TRGJ2 | Up | 3.04 | 0.0396 | (T Cell Receptor Gamma Joining 2) is a Protein Coding gene. |
| T cell | TRGV9 | Up | 3.04 | 0.0396 | Predicted to enable MHC protein and peptide antigen binding activity. Involved in adaptive immune response and innate immune response. |
| T cell | TRGJP | Up | 3.04 | 0.0396 | (T Cell Receptor Gamma Joining P) is a Protein Coding gene. |
| T cell | TRGC2 | Up | 3.04 | 0.0396 | Predicted to enable transmembrane signaling receptor activity, T cell receptor signaling pathway, adaptive immune response, and antigen recognition. |
| B cell | SHLD2/C20orf196 | Up | 2.15 | 0.0166 | Mediates immunoglobulin class-switch recombination, and fusion of unprotected telomeres. |
| B cell | FCRL3 | Up | 3.5 | 0.0487 | Promotes TLR9-induced B-cell proliferation, activation and survival but inhibits antibody production and suppresses plasma cell differentiation. Enhances activation of NF-kappa-B and MAPK signaling pathways in TLR9 stimulated B-cells |
| B cell | IL7 | Up | 2.03 | 0.0211 | It encodes a cytokine important for B and T cell development and functions as a pre-pro-B cell growth-stimulating factor. |
| T/B cell | LMBR1L | Down | -2.06 | 0.0107 | Plays an essential role in lymphocyte development by negatively regulating the canonical Wnt signaling pathway |
| innate | ART1 | Up | 2.03 | 0.0339 | ART1 (ADP-Ribosyltransferase 1) impacts pathways related to Defensins and Innate Immune System. |
| innate | ATP1B1 | Up | 2.21 | 0.0381 | Plays a role in innate immunity by enhancing virus-triggered induction of interferons (IFNs) and interferon stimulated genes (ISGs). |
| innate | CLEC12A | Up | 8.78 | 0.0069 | This gene encodes a member of the C-type lectin/C-type lectin-like domain (CTL/CTLD) superfamily. Functions include cell adhesion, cell-cell signaling, glycoprotein turnover, and roles in inflammation and immune response. The protein encoded also acts as a negative regulator of granulocyte and monocyte function. |
| innate | CLEC12B | Up | 3.09 | 0.0352 | Involved in protein phosphatase binding activity, signalling receptor inhibitor activity, natural killer cell inhibitory signaling pathway; and regulation of signal transduction. |
| innate | GCC2 | Up | 2.16 | 0.0229 | It is involved in recycling of the mannose 6-phosphate receptor from the late endosomes to the TGN. May also play a role in transport between the recycling endosomes and the Golgi. |
| innate | OSTM1 | Up | 2.03 | 0.039 | May be involved in the degradation of G proteins via the ubiquitin-dependent proteasome pathway. |
| innate | PDE4DIP | Up | 2.02 | 0.0208 | Among its related pathways is VEGFA-VEGFR2 signaling. Gene Ontology (GO) annotations related to this gene include *binding* and *enzyme binding* |
| innate | RNF185 | Up | 2.01 | 0.0399 | Involved in pathways related to ubiquitin. Also acts as a regulator of the innate antiviral response by catalyzing 'Lys-27'-linked polyubiquitination of CGAS. |
| innate | TRIM15 | Up | 2.32 | 3.00E-04 | Known to function in the RIGI-mediated interferon induction pathway upstream or at the level of MAVS Inhibits NF-kappa-B activation. |
| innate | RNF5 | Down | -2.09 | 0.0118 | Mediates polyubiquitination of STING1 leading to its proteasomal degradation; the ubiquitination occurs in mitochondria after viral transfection and regulates antiviral responses. |
| innate | STX10 | Down | -2.01 | 0.0079 | SNARE involved in vesicular transport from the late endosomes to the trans-Golgi network. |
| innate | RASSF6 | Down | -2.06 | 0.0416 | Involved in the induction of apoptosis, through both caspase-dependent and caspase-independent pathways. May act as a Ras effector protein and suppress the serum-induced basal levels of NF-kappa-B (By similarity). |
| innate | ATG13 | Down | -2.06 | 0.0375 | The encoded protein is essential for autophagosome formation and mitophagy. |
