# Supplementary material for: Host transcriptional profiling identifies B cell associated genes to be upregulated in individuals with asymptomatic COVID-19 and latent tuberculosis
Source: Research Square preprint supplement (doi:10.21203/rs.3.rs-8500902/v1), 2026-01-12
Supplement: Supplementary file 2 [file 6cde05a2362c0955aaceb1a4.docx]

| **S Table 1. List of RNA microarrays used in the study** | | |  |  |
| --- | --- | --- | --- | --- |
|  | | |  |  |
| Array name | Label | GEO | Age | Gender |
| CoV2 | Asmp-Covid-LTBi | GSM5374860 | 46 | Male |
| CoV9 | Asymp-Covid-LTBi | GSM5374858 | 27 | Male |
| CoV1 | Asymp-Covid | GSM5374859 | 36 | Male |
| CoV5 | Asymp-Covid | GSM5374861 | 30 | Male |
| CoV20 | Asymp-Covid | GSM5374862 | 46 | Male |
| CoV29 | Asymp-Covid | GSM5374864 | 28 | Male |
| CoV30 | Asymp-Covid | GSM5374865 | 19 | Female |
| CoV33 | Asymp-Covid | GSM5374866 | 34 | Female |
| CoV34 | Asymp-Covid | GSM5374867 | 45 | Male |
| CoV-Ar2 | Asymp-Covid | GSM5374850 | 50 | Male |
| CoV-Ar3 | Asymp-Covid | GSM5374851 | 46 | Male |
| CoV-Ar4 | Asymp-Covid | GSM5374852 | 25 | Female |
| CoV-Ar11 | Asymp-Covid | GSM5374853 | 49 | Female |
| CoV6 | Asymp-Covid | GSM5374854 | 29 | Male |
| CoV7 | Asymp-Covid | GSM5374855 | 38 | Female |
| CoV12 | Asymp-Covid | GSM5374857 | 25 | Female |
| CoV13 | Asymp-Covid | GSM5374856 | 38 | Male |
| CoV18 | Asymp-Covid | GSM8327185 | 35 | Male |
| CoVAr34 | Asymp-Covid | GSM8327190 | 34 | Male |
| CoVAr62 | Asymp-Covid | GSM8327180 | 26 | Male |
| CoVAr63 | Asymp-Covid | GSM8327181 | 47 | Male |
| CoVAr64 | Asymp-Covid | GSM8327182 | 29 | Male |
