# Supplementary material for: Host transcriptional profiling identifies B cell associated genes to be upregulated in individuals with asymptomatic COVID-19 and latent tuberculosis
Source: Research Square preprint supplement (doi:10.21203/rs.3.rs-8500902/v1), 2026-01-12
Supplement: Supplementary file 3 [file 816f8d1737f1c4785988d47f.xlsx]

## Sheet: LTBi_COV(yes_no)QCmetrics
S Table 2. Quality metrics from microarray samples used in the study
Sample ID	Labeling Controls Threshold	Hybridization Controls Threshold	Pos vs Neg AUC Threshold	pm mean	bgrd mean	all probeset mean	all probeset stdev	all probeset mad residual mean	all probeset mad residual stdev	all probeset rle mean	all probeset rle stdev	control->bgp->antigenomic mean	control->bgp->antigenomic stdev	control->bgp->antigenomic mad residual mean	control->bgp->antigenomic mad residual stdev	control->bgp->antigenomic rle mean	control->bgp->antigenomic rle stdev	polya spike mean	polya spike stdev	polya spike mad residual mean	polya spike mad residual stdev	polya spike rle mean	polya spike rle stdev	bac spike mean	bac spike stdev	bac spike mad residual mean	bac spike mad residual stdev	bac spike rle mean	bac spike rle stdev	ercc->step mean	ercc->step stdev	ercc->step mad residual mean	ercc->step mad residual stdev	ercc->step rle mean	ercc->step rle stdev	pos control mad residual mean	pos control mad residual stdev	pos control rle mean	pos control rle stdev	neg control mad residual mean	neg control mad residual stdev	neg control rle mean	neg control rle stdev	polya spike-AFFX-r2-Bs-lys-5 st	polya spike-AFFX-r2-Bs-phe-5 st	polya spike-AFFX-r2-Bs-thr-5 s st	polya spike-AFFX-r2-Bs-dap-5 st	bac spike-AFFX-r2-Ec-bioB-5 at	bac spike-AFFX-r2-Ec-bioC-5 at
CoVAr62	Pass	Pass	Pass	284.355	108.815	7.05318	3.05164	0.549024	0.285662	0.534981	0.656925	3.05746	0.171649	0.472718	0.0838867	0.0906223	0.0399735	6.94243	1.50342	0.289396	0.129423	0.462236	0.458275	10.7462	1.82208	0.124943	0.124532	0.288698	0.128949	5.19559	0.533725	0.361506	0.0997539	0.730644	0.200538	0.354144	0.302246	0.900195	1.07468	0.58645	0.499109	0.694967	0.69916	5.23913	6.45621	7.24784	8.82655	8.688	9.97182
CoVAr63	Pass	Pass	Pass	345.721	125.591	7.05215	3.10239	0.53676	0.284495	0.605955	0.787079	3.03628	0.179275	0.436043	0.0689992	0.111804	0.029722	6.26492	1.39193	0.290338	0.152272	0.44365	0.234055	10.8979	1.88595	0.0979233	0.0692307	0.154818	0.132945	5.07831	0.447002	0.416984	0.146278	0.641642	0.190234	0.344394	0.295225	1.10345	1.36331	0.564498	0.505577	0.694636	0.629451	4.55056	6.02087	6.57477	7.91349	8.78783	10.0723
CoVAr64	Pass	Pass	Pass	299.933	120.908	7.0615	3.11347	0.559625	0.292907	0.606994	0.792806	3.1183	0.168981	0.494876	0.0681762	0.0337034	0.0339824	6.85488	1.43945	0.293556	0.239397	0.397377	0.5103	11.0539	1.85966	0.0900185	0.0628831	0.109627	0.0460012	5.15532	0.524012	0.39022	0.0778745	0.690376	0.226409	0.357885	0.30653	1.20974	1.5065	0.613297	0.527454	0.721842	0.672663	5.22536	6.56053	6.91588	8.71776	8.95968	10.2424
CoV18	Pass	Pass	Pass	295.154	132.388	7.01786	2.93576	0.688122	0.371048	0.858872	0.933135	3.23812	0.186576	0.576893	0.0864228	0.0900404	0.0261727	7.42769	1.26504	0.338148	0.154206	0.947489	0.676827	11.7681	1.5815	0.0776254	0.056966	0.733182	0.281782	5.62345	0.549628	0.437568	0.092803	1.1585	0.208294	0.380546	0.332313	1.15766	0.995473	0.720364	0.640285	1.02456	0.895316	5.97195	7.21724	7.47038	9.05118	9.91147	11.2396
CoVAr34	Pass	Pass	Pass	400.155	189.866	7.04358	3.06968	0.471935	0.260443	0.559561	0.766104	2.99308	0.151535	0.397174	0.063918	0.154998	0.055458	7.29148	1.64638	0.281982	0.168276	0.811281	0.293875	11.0607	1.91288	0.0885253	0.0388822	0.0955939	0.0762047	4.75154	0.727374	0.339323	0.0869209	0.286597	0.171798	0.29203	0.267464	0.982741	1.26773	0.51747	0.478997	0.710698	0.699435	5.34516	6.89227	7.61765	9.31084	8.88335	10.2421
CoVAr2	Pass	Pass	Pass	72.9312	55.2758	7.02115	2.89384	0.621745	0.319421	0.42	0.408712	3.35533	0.167848	0.643438	0.0843826	0.207248	0.0727023	6.39541	1.9314	0.342767	0.266554	0.107484	0.0861311	11.0162	1.74961	0.0683955	0.0110246	0.0900917	0.0463182	3.88622	0.703684	0.33732	0.0791599	0.578725	0.199481	0.38953	0.33049	0.478846	0.466466	0.718307	0.579989	0.823003	0.764663	3.99748	5.97135	7.00665	8.60615	8.87613	10.4889
CoVAr3	Pass	Pass	Pass	80.2228	60.8791	6.99285	2.83142	0.636667	0.333723	0.440578	0.44124	3.39811	0.238406	0.655563	0.148411	0.250023	0.0330493	6.86673	1.84068	0.218233	0.153507	0.38653	0.0975291	11.2414	1.70889	0.0745579	0.0342139	0.20649	0.153537	4.60532	0.670841	0.307545	0.0815795	0.164218	0.135015	0.445075	0.392273	0.630414	0.650603	0.766329	0.614205	0.861552	0.81175	4.48627	6.66964	7.40151	8.90949	9.1351	10.73
CoVAr4	Pass	Pass	Pass	71.9825	54.4258	7.01129	2.90372	0.670271	0.361761	0.440518	0.426201	3.54578	0.216938	0.774428	0.152064	0.397702	0.0525803	7.21575	1.62496	0.264313	0.142681	0.735556	0.309311	11.2268	1.63424	0.0856199	0.0340697	0.232332	0.159805	4.63345	0.689436	0.386111	0.0923397	0.215352	0.177657	0.411953	0.40291	0.540297	0.524	0.792982	0.692674	0.981256	0.912185	5.13866	6.905	7.83536	8.984	9.21302	10.75
CoVAr11	Pass	Pass	Pass	73.6857	57.9963	6.98706	2.78031	0.673731	0.34893	0.469171	0.453031	3.52223	0.252776	0.696929	0.127152	0.374153	0.0474264	6.65746	2.06816	0.405469	0.139104	0.223265	0.105949	11.0087	1.80556	0.0644518	0.0519932	0.037354	0.0311632	4.02493	0.79855	0.332872	0.0873843	0.463828	0.15614	0.470188	0.408216	0.628859	0.615433	0.803012	0.68884	0.916874	0.904627	4.00181	6.38665	7.27692	8.96447	8.83079	10.404
CoV6	Pass	Pass	Pass	83.8473	62.5857	7.00411	2.86102	0.606193	0.318374	0.398574	0.383791	3.38931	0.200905	0.651381	0.13878	0.241227	0.06208	7.3197	1.50975	0.214314	0.0767673	0.839504	0.39749	10.9962	1.76649	0.0825525	0.0280761	0.0643206	0.0619768	4.21366	0.764203	0.336312	0.0901317	0.288389	0.14553	0.38906	0.339631	0.491486	0.500446	0.704064	0.627861	0.844131	0.744974	5.47266	6.96531	7.75795	9.08289	8.85017	10.4232
CoV7	Pass	Pass	Pass	76.4367	55.2278	7.00583	2.8307	0.61734	0.316557	0.439875	0.438639	3.3929	0.330122	0.622192	0.155366	0.244821	0.127196	6.19663	1.80936	0.327743	0.0925481	0.283568	0.0964462	10.5911	1.91249	0.121005	0.102187	0.44378	0.0970993	3.9896	0.634408	0.295727	0.0704796	0.475344	0.131777	0.411879	0.357742	0.576404	0.567433	0.705985	0.587829	0.844544	0.748587	3.90101	5.91786	6.72223	8.24542	8.25533	10.0073
CoV13	Pass	Pass	Pass	91.7592	69.9749	6.97305	2.79253	0.610227	0.316908	0.455503	0.42676	3.30414	0.267388	0.538388	0.105784	0.156052	0.0727956	7.06497	1.96472	0.314482	0.14991	0.584772	0.262697	10.4854	1.93215	0.117151	0.060292	0.549524	0.108359	4.28148	0.812653	0.370003	0.118933	0.251945	0.164791	0.435555	0.387684	0.648984	0.564022	0.713007	0.581748	0.912069	0.912355	4.44643	6.8605	7.88605	9.06689	8.13021	9.86459
CoV12	Pass	Pass	Pass	66.7459	49.639	7.00327	2.89187	0.650226	0.343803	0.391876	0.383995	3.39059	0.208854	0.683196	0.134929	0.242509	0.0590479	6.72207	2.02214	0.334974	0.25474	0.274823	0.212399	11.0479	1.7269	0.0776419	0.0230058	0.115385	0.0941677	3.93226	0.7746	0.354597	0.101354	0.551442	0.200659	0.399709	0.362296	0.448679	0.497486	0.792162	0.637058	0.87139	0.833302	4.02791	6.77383	7.17296	8.91357	8.89081	10.5689
CoV9	Pass	Pass	Pass	101.628	64.006	7.01505	2.94514	0.491745	0.269081	0.327119	0.312265	3.14406	0.217804	0.476598	0.116453	0.015502	0.00888209	7.49228	1.82396	0.207947	0.0753798	1.01208	0.284825	10.5426	1.71905	0.0877065	0.0590568	0.49234	0.13463	4.63171	0.792664	0.306286	0.127124	0.184154	0.224074	0.297814	0.274393	0.412949	0.378435	0.631672	0.544694	0.735178	0.666724	5.0103	7.60317	7.97181	9.38384	8.44127	10.0111
CoV1	Pass	Pass	Pass	379.832	226.61	7.03787	2.95815	0.444944	0.239881	0.330425	0.333676	3.02624	0.16931	0.394956	0.0780817	0.121843	0.0538095	5.36293	1.46228	0.346209	0.214142	1.11726	0.493382	11.191	1.86697	0.0722392	0.0581991	0.156069	0.0435942	4.47894	0.602158	0.382633	0.0823895	0.163522	0.219361	0.267769	0.240455	0.419791	0.363821	0.574112	0.498392	0.665448	0.673693	3.66974	5.09698	5.45989	7.22512	8.97701	10.4892
CoV2	Pass	Pass	Pass	458.522	308.473	7.02949	2.87249	0.459711	0.231708	0.350763	0.349222	3.06217	0.189256	0.378225	0.0518029	0.0859064	0.0206366	4.58632	1.05181	0.450474	0.190677	1.89388	0.864341	10.9894	2.0594	0.105223	0.0200272	0.152551	0.147318	4.26098	0.59098	0.428557	0.13929	0.244534	0.41482	0.29823	0.247521	0.432468	0.430089	0.508374	0.424504	0.628434	0.61712	3.1707	4.64567	4.82192	5.707	8.51085	10.3153
CoV5	Pass	Pass	Pass	461.005	271.983	7.04795	3.04262	0.40747	0.219541	0.348794	0.354973	3.06488	0.162208	0.370987	0.0439519	0.0832053	0.0620001	5.17887	1.01858	0.282341	0.129693	1.30133	0.905167	11.1376	1.97943	0.0701386	0.0385135	0.136812	0.0999463	4.38522	0.539923	0.377888	0.0789247	0.123758	0.234596	0.250075	0.219497	0.552501	0.511809	0.506097	0.460357	0.587327	0.602091	4.04854	4.86326	5.31452	6.48916	8.77219	10.4159
CoV20	Pass	Pass	Pass	530.042	207.502	7.06758	3.01386	0.448765	0.241333	0.474421	0.599027	2.8355	0.160346	0.318834	0.0569131	0.31258	0.0466695	5.21927	1.16288	0.245357	0.0449998	1.26093	0.781304	10.7518	1.89765	0.100937	0.068513	0.283056	0.0749213	4.62097	0.507417	0.378438	0.089383	0.262462	0.229802	0.27456	0.232527	0.833435	1.05444	0.50196	0.466058	0.625604	0.602005	3.84448	5.15105	5.1921	6.68945	8.52465	10.0472
CoV29	Pass	Pass	Pass	327.257	161.286	7.0616	3.05837	0.481488	0.255518	0.416975	0.442976	3.09711	0.186942	0.442956	0.0778825	0.0509708	0.0273835	5.41811	1.2633	0.257212	0.108403	1.06209	0.672502	11.0091	1.91052	0.0873254	0.0526911	0.0567038	0.0411944	4.30668	0.504143	0.351265	0.0846509	0.190041	0.249574	0.292847	0.25379	0.692597	0.780867	0.546612	0.479975	0.651548	0.619693	3.8117	5.1049	6.01281	6.74304	8.73883	10.3201
CoV30	Pass	Pass	Pass	315.098	170.591	7.03645	3.00732	0.491462	0.268207	0.401662	0.400193	3.10246	0.17119	0.444453	0.0793121	0.0456257	0.0497937	5.54298	1.29102	0.343961	0.155593	0.937217	0.640618	11.3081	1.90861	0.0741544	0.0671885	0.27322	0.0767293	4.39518	0.522603	0.389878	0.0872671	0.13718	0.232162	0.29655	0.278705	0.589036	0.543202	0.621103	0.529819	0.732546	0.690455	3.92547	5.53534	5.62644	7.08468	9.00223	10.6653
CoV33	Pass	Pass	Pass	272.21	141.725	7.06044	3.00405	0.551328	0.286313	0.421475	0.408803	3.14726	0.21202	0.491322	0.0666676	0.00958276	0.00487668	5.25801	1.37655	0.347917	0.0820735	1.22219	0.586413	11.001	1.88884	0.116648	0.0574825	0.0356062	0.0544291	4.17194	0.566801	0.389013	0.0979167	0.292997	0.197337	0.353762	0.307087	0.595762	0.504632	0.656502	0.559133	0.764753	0.740968	3.72388	4.90257	5.36033	7.04527	8.72449	10.3595
CoV34	Pass	Pass	Pass	277.496	168.51	7.03368	2.97779	0.543553	0.286112	0.400215	0.456396	3.17963	0.200417	0.483656	0.0845293	0.0315497	0.0306088	5.69146	1.34952	0.329234	0.125594	0.811376	0.541539	11.3985	1.86926	0.140888	0.0643872	0.363572	0.0780404	4.46143	0.548444	0.408035	0.0976604	0.132084	0.230312	0.337454	0.29164	0.469062	0.543051	0.645741	0.555398	0.734436	0.689982	4.13909	5.37811	5.84486	7.40377	9.17994	10.7709
[truncated: 44 more columns]
