# Supplementary material for: Host transcriptional profiling identifies B cell associated genes to be upregulated in individuals with asymptomatic COVID-19 and latent tuberculosis
Source: Research Square preprint supplement (doi:10.21203/rs.3.rs-8500902/v1), 2026-01-12
Supplement: Supplementary file 4 [file 98daa51211a18051f7d22c6b.docx]

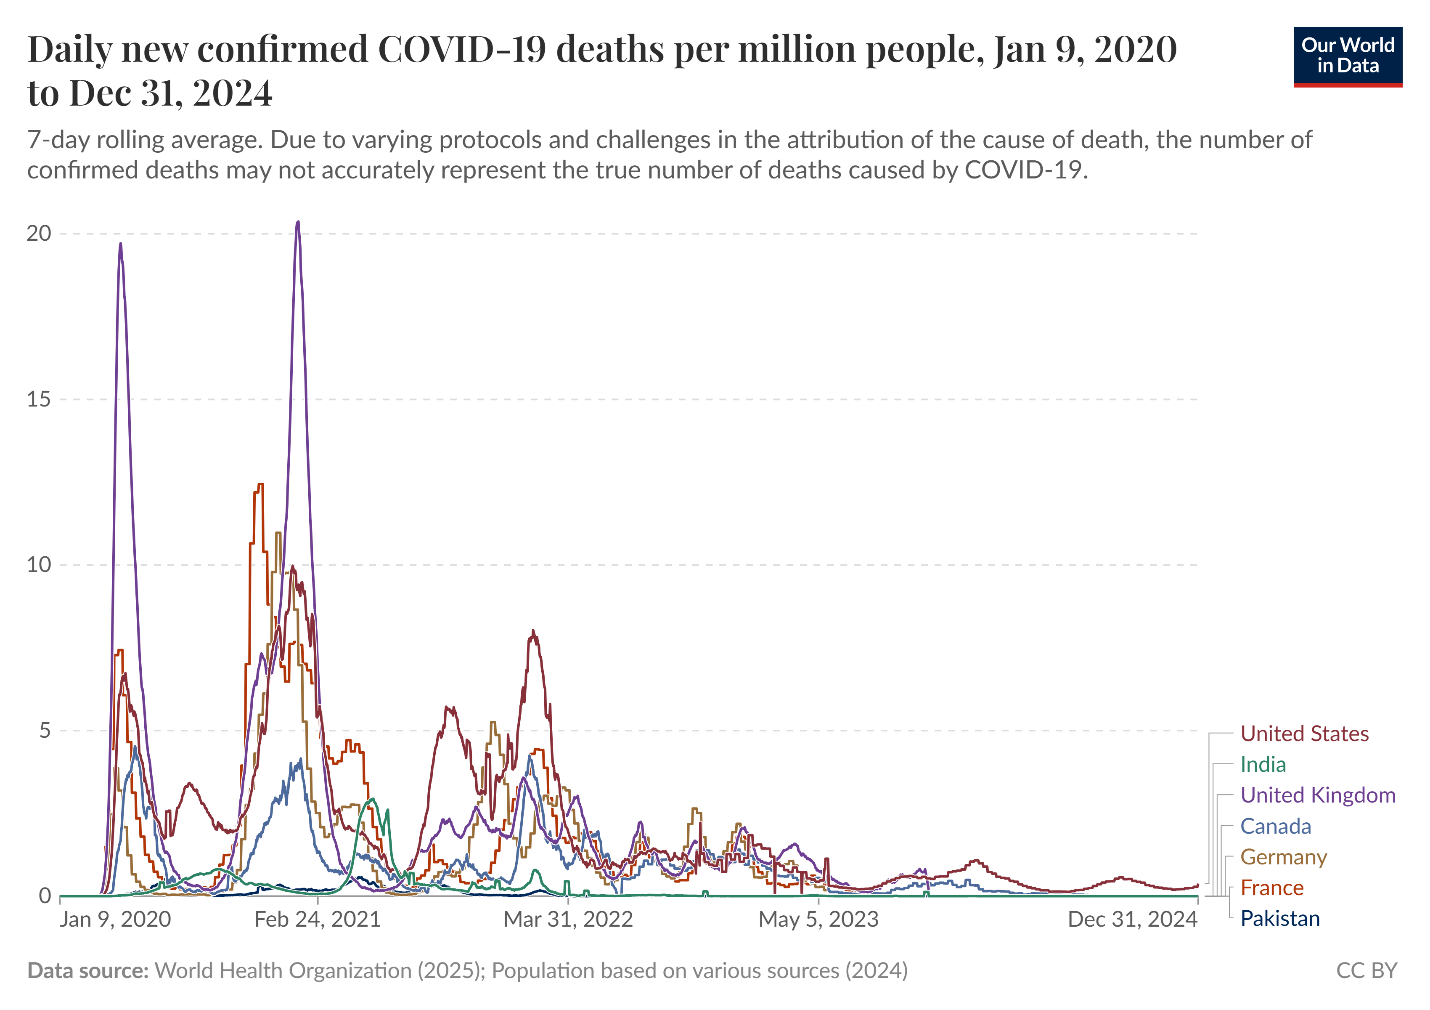


α

ο

δ

**Fig S1. Global trends in COVID-19 mortality across countries with differing TB burden and income status**

The figure illustrates the trends in COVID-19 mortality rates from January 2020 to December 2024 across the selected countries like Pakistan and India (high TB burden countries) along with United States, UK, Canada, Germany, followed by France (high-income, low TB burden countries). The y axis shows COVID-19 mortality expressed as deaths per million while the x axis denotes time. Distinct mortality peaks correspond to subsequent pandemic waves dominated by the alpha, delta, and omicron variants. Notably, higher and more sustained mortality peaks are observable in low TB burden countries, whereas high TB burden settings show comparatively lower mortality rates. Our source for COVID-19 mortality data is Our World in Data (link: <https://ourworldindata.org/covid-deaths>).
