# Supplementary material for: Host transcriptional profiling identifies B cell associated genes to be upregulated in individuals with asymptomatic COVID-19 and latent tuberculosis
Source: Research Square preprint supplement (doi:10.21203/rs.3.rs-8500902/v1), 2026-01-12
Supplement: Supplementary file 5 [file ac6871b7c5f5c5df46ec8f26.xlsx]

## Sheet: Sheet1
S Table 3. Sample signals from DEGs from comparison of LTBI-COVID and COVID groups
ID	yes Avg (log2)	no Avg (log2)	Fold Change	P-val	FDR P-val	Gene Symbol	Description
TC0600007512.hg.1	4.62	3.4	2.32	0.0003	0.9999	TRIM15	tripartite motif containing 15
TC1300008264.hg.1	7.02	5.87	2.22	0.0003	0.9999	N6AMT2	N-6 adenine-specific DNA methyltransferase 2 (putative)
TC2000007516.hg.1	7.63	6.39	2.37	0.0007	0.9999	SLC12A5	solute carrier family 12 (potassium/chloride transporter), member 5
TC16_KI270728v1_random00006432.hg.1	5.14	4.1	2.06	0.0009	0.9999	TP53TG3B	TP53 target 3B
TC1600007621.hg.1	5.14	4.1	2.06	0.0009	0.9999	TP53TG3C	Homo sapiens TP53 target 3B (TP53TG3B), transcript variant 1, mRNA.; Homo sapiens TP53 target 3C (TP53TG3C), transcript variant 1, mRNA.; Homo sapiens TP53 target 3 (TP53TG3), transcript variant 1, mRNA.; Homo sapiens TP53 target 3 (TP53TG3), transcript variant 3, non-coding RNA.; Homo sapiens TP53 target 3B (TP53TG3B), transcript variant 3, non-coding RNA.; Homo sapiens TP53 target 3 (TP53TG3), …
TC1600007621.hg.1	5.14	4.1	2.06	0.0009	0.9999	TP53TG3	Homo sapiens TP53 target 3B (TP53TG3B), transcript variant 1, mRNA.; Homo sapiens TP53 target 3C (TP53TG3C), transcript variant 1, mRNA.; Homo sapiens TP53 target 3 (TP53TG3), transcript variant 1, mRNA.; Homo sapiens TP53 target 3 (TP53TG3), transcript variant 3, non-coding RNA.; Homo sapiens TP53 target 3B (TP53TG3B), transcript variant 3, non-coding RNA.; Homo sapiens TP53 target 3 (TP53TG3), …
TC1600007621.hg.1	5.14	4.1	2.06	0.0009	0.9999	LOC102723655	Homo sapiens TP53 target 3B (TP53TG3B), transcript variant 1, mRNA.; Homo sapiens TP53 target 3C (TP53TG3C), transcript variant 1, mRNA.; Homo sapiens TP53 target 3 (TP53TG3), transcript variant 1, mRNA.; Homo sapiens TP53 target 3 (TP53TG3), transcript variant 3, non-coding RNA.; Homo sapiens TP53 target 3B (TP53TG3B), transcript variant 3, non-coding RNA.; Homo sapiens TP53 target 3 (TP53TG3), …
TC2100008380.hg.1	8.24	7.22	2.02	0.0014	0.9999	KRTAP12-2	keratin associated protein 12-2
TC0800009717.hg.1	5.64	4.58	2.08	0.0016	0.9999	FGF20	fibroblast growth factor 20
TC0X00010204.hg.1	5.41	4.05	2.57	0.0022	0.9999	SATL1	spermidine/spermine N1-acetyl transferase-like 1
TC1800009306.hg.1	5.97	4.9	2.1	0.0028	0.9999	RNF152	ring finger protein 152
TC0800011646.hg.1	4.37	3.32	2.06	0.0057	0.9999	HAS2	hyaluronan synthase 2
TC1200006779.hg.1	13.89	10.76	8.78	0.0069	0.9999	CLEC12A	C-type lectin domain family 12, member A
TC1900009769.hg.1	5.59	6.59	-2.01	0.0079	0.9999	STX10	syntaxin 10
TC0600012316.hg.1	13.56	12.39	2.26	0.0079	0.9999	TMEM30A	transmembrane protein 30A
TC0600008209.hg.1	3.56	4.59	-2.04	0.008	0.9999	CENPQ	centromere protein Q
TC0200013330.hg.1	8.02	6.54	2.8	0.0105	0.9999	PLGLB1	plasminogen-like B1; plasminogen-like B2
TC0200013330.hg.1	8.02	6.54	2.8	0.0105	0.9999	PLGLB2	plasminogen-like B1; plasminogen-like B2
TC1200010615.hg.1	6.37	7.41	-2.06	0.0107	0.9999	LMBR1L	limb development membrane protein 1-like
TC0600007636.hg.1	9.19	10.26	-2.09	0.0118	0.9999	RNF5	ring finger protein 5, E3 ubiquitin protein ligase
TC1400007087.hg.1	8.92	7.85	2.09	0.0145	0.9999	MGAT2	mannosyl (alpha-1,6-)-glycoprotein beta-1,2-N-acetylglucosaminyltransferase
TC0X00011226.hg.1	6.28	5.02	2.4	0.0148	0.9999	F8	coagulation factor VIII, procoagulant component
TC0X00010366.hg.1	5.04	6.17	-2.19	0.0155	0.9999	ARMCX6	armadillo repeat containing, X-linked 6
TC0800007665.hg.1	5.09	4.07	2.03	0.0163	0.9999	RP1	retinitis pigmentosa 1 (autosomal dominant)
TC2000006625.hg.1	6.31	5.2	2.15	0.0166	0.9999	C20orf196	Transcript Identified by AceView, Entrez Gene ID(s) 149840
TC0700009399.hg.1	7.33	6.08	2.38	0.0189	0.9999	TAS2R4	taste receptor, type 2, member 4
TC0100009846.hg.1	6.2	5.19	2.02	0.0208	0.9999	PDE4DIP	Transcript Identified by AceView, Entrez Gene ID(s) 9659
TC0800010880.hg.1	6.76	5.74	2.03	0.0211	0.9999	IL7	interleukin 7
TC1100008652.hg.1	4.7	5.85	-2.22	0.0211	0.9999	TMEM126A	transmembrane protein 126A
TC1200007120.hg.1	6.58	5.41	2.26	0.0223	0.9999	RASSF8	Ras association (RalGDS/AF-6) domain family (N-terminal) member 8
TC0200013805.hg.1	7.49	6.38	2.16	0.0229	0.9999	GCC2	Jeck2013 ANTISENSE, CDS, coding, INTERNAL, intronic, OVCODE, OVEXON best transcript NM_181453
TC0600012631.hg.1	9.01	8.01	2	0.028	0.9999	MMS22L	MMS22-like, DNA repair protein
TC0400010171.hg.1	6.28	5.26	2.03	0.0297	0.9999	LCORL	Transcript Identified by AceView, Entrez Gene ID(s) 254251
TC0300013827.hg.1	4.45	5.56	-2.15	0.0297	0.9999	WDR6	WD repeat domain 6
TC2000007945.hg.1	7.72	6.7	2.02	0.031	0.9999	C20orf197	chromosome 20 open reading frame 197
TC1100006629.hg.1	7.57	6.55	2.03	0.0339	0.9999	ART1	ADP-ribosyltransferase 1
TC1200008574.hg.1	11.82	10.79	2.04	0.0342	0.9999	APAF1	apoptotic peptidase activating factor 1
TC1200006781.hg.1	8.59	6.96	3.09	0.0352	0.9999	CLEC12B	C-type lectin domain family 12, member B
TC1100007457.hg.1	7.33	8.37	-2.06	0.0375	0.9999	ATG13	autophagy related 13
TC0100010543.hg.1	6.38	5.23	2.21	0.0381	0.9999	ATP1B1	ATPase, Na+/K+ transporting, beta 1 polypeptide
TC0600014328.hg.1	12.31	11.29	2.03	0.039	0.9999	OSTM1	osteopetrosis associated transmembrane protein 1
TC0700013538.hg.1	14.69	13.09	3.04	0.0396	0.9999	TRGJ1	T cell receptor gamma joining 1; T cell receptor gamma constant 2; T cell receptor gamma joining 2; T cell receptor gamma variable 9; T cell receptor gamma constant 1; T cell receptor gamma joining P; T cell receptor gamma joining P2
TC0700013538.hg.1	14.69	13.09	3.04	0.0396	0.9999	TRGC2	T cell receptor gamma joining 1; T cell receptor gamma constant 2; T cell receptor gamma joining 2; T cell receptor gamma variable 9; T cell receptor gamma constant 1; T cell receptor gamma joining P; T cell receptor gamma joining P2
TC0700013538.hg.1	14.69	13.09	3.04	0.0396	0.9999	TRGJ2	T cell receptor gamma joining 1; T cell receptor gamma constant 2; T cell receptor gamma joining 2; T cell receptor gamma variable 9; T cell receptor gamma constant 1; T cell receptor gamma joining P; T cell receptor gamma joining P2
TC0700013538.hg.1	14.69	13.09	3.04	0.0396	0.9999	TRGV9	T cell receptor gamma joining 1; T cell receptor gamma constant 2; T cell receptor gamma joining 2; T cell receptor gamma variable 9; T cell receptor gamma constant 1; T cell receptor gamma joining P; T cell receptor gamma joining P2
TC0700013538.hg.1	14.69	13.09	3.04	0.0396	0.9999	TRGC1	T cell receptor gamma joining 1; T cell receptor gamma constant 2; T cell receptor gamma joining 2; T cell receptor gamma variable 9; T cell receptor gamma constant 1; T cell receptor gamma joining P; T cell receptor gamma joining P2
TC0700013538.hg.1	14.69	13.09	3.04	0.0396	0.9999	TRGJP	T cell receptor gamma joining 1; T cell receptor gamma constant 2; T cell receptor gamma joining 2; T cell receptor gamma variable 9; T cell receptor gamma constant 1; T cell receptor gamma joining P; T cell receptor gamma joining P2
TC0700013538.hg.1	14.69	13.09	3.04	0.0396	0.9999	TRGJP2	T cell receptor gamma joining 1; T cell receptor gamma constant 2; T cell receptor gamma joining 2; T cell receptor gamma variable 9; T cell receptor gamma constant 1; T cell receptor gamma joining P; T cell receptor gamma joining P2
TC2200007087.hg.1	6.17	5.17	2.01	0.0399	0.9999	RNF185	Transcript Identified by AceView, Entrez Gene ID(s) 91445
TC1200012258.hg.1	3.96	5.2	-2.36	0.0403	0.9999	PITPNM2	phosphatidylinositol transfer protein, membrane-associated 2
TC0400011005.hg.1	3.2	4.24	-2.06	0.0416	0.9999	RASSF6	Ras association (RalGDS/AF-6) domain family member 6
TC1100013042.hg.1	6.2	7.26	-2.09	0.0436	0.9999	SSSCA1	Sjogren syndrome/scleroderma autoantigen 1
TC0700012180.hg.1	8.06	6.96	2.15	0.0438	0.9999	SYPL1	synaptophysin-like 1
TC0600014162.hg.1	6.49	5.4	2.13	0.0442	0.9999	TSTD3	thiosulfate sulfurtransferase (rhodanese)-like domain containing 3
TC0300013684.hg.1	9.23	8.12	2.16	0.0466	0.9999	TFRC	transferrin receptor
TC0100016049.hg.1	11.89	10.08	3.5	0.0487	0.9999	FCRL3	Fc receptor-like 3
TC0100007672.hg.1	6.25	7.26	-2.02	0.0492	0.9999	EIF3I	eukaryotic translation initiation factor 3, subunit I
TC1100013185.hg.1	7.09	8.52	-2.7	0.0493	0.9999	FAU	Finkel-Biskis-Reilly murine sarcoma virus (FBR-MuSV) ubiquitously expressed
